# Supplementary material for: Prospective study and new concepts based on scoliosis detorsion of the first 225 early in-brace radiological results with the new Lyon brace: ARTbrace
Source: Scoliosis. 2014 Nov 19;9:19. doi: 10.1186/1748-7161-9-19 (PMC4349706; doi:10.1186/1748-7161-9-19)
Supplement: Supplementary file 2 — Additional file 2: Database of 225 first consecutive patients treated with ARTbrace. (XLSX 36 KB) [file 13013_2014_971_MOESM2_ESM.xlsx]

## Sheet: ARTbrace 
									Corr T	Corr L	% T	% L	Initial Kyp	In-brace Kyphosis
1	F	2000-03-25	T6	T11	25	T11	L4	21	9	9	0.64	0.57
2	F	1999-10-29	T6	T12	37				16		0.57
3	F	2000-06-21	T5	T12	48	T12	L4	30	31	20	0.375	0.33
4	F	2000-08-23	T4	T11	38	T11	L4	25	14	15	0.34	0.44
5	F	2001-05-10	T6	T11	23	T11	L3		12		0.48		12	28
6	F	2000-03-02	T6	T10	28	T10	L4		14	7	0.5		24	29
7	F	1999-08-21	T6	T11	26	T11	L4	19	12	6	0.54	0.68
8	F	2000-02-09	T6	T9	20	T12	L4	21	4	8	0.8	0.62
9	F	1997-12-23	T6	T12	14	T12	L4	25		7		0.72
10	F	1996-10-15	T5	T12	27	T12	L4		14		0.481481
11	F	2001-07-22	T5	T11	22				9		0.590909		12	15
12	F	1998-08-10	T6	T10	47	T10	L4	48	34	27	0.28	0.44	24	30
13	F	2002-07-01				T10	L3	23		5		0.782609	29	23
14	M	2000-10-03	T3	T10	20	T10	L4	18	4	3	0.8	0.833333
15	F	1998-12-02	T6	T11	27	T11	L4	21	11	13	0.592593	0.380952
16	F	2002-02-19	T5	T12	25	T12	L4		2		0.92		15	20
17	F	2000-10-05				T8	L2	28		6		0.785714
18	F	1999-12-17				T10	L2	17		3		0.82
19	F	1999-08-22				T11	L4	23		12		0.478261	28	32
20	F	2000-06-27				T10	L3	18		1		0.944444	28	33
21	F	2001-06-22	T6	T11	25	T12	L4	16	8	0	0.68	1
22	F	2002-05-14	T8	L1	27				5		0.814815		18	18
23	F	1998-03-01				T12	L4	15		3		0.8
24	F	2002-06-18				T12	L4	23		9		0.608696	20	30
25	F	2000-01-25	T5	T11	50	T11	L4	42	28	24	0.44	0.428571	27	34
26	M	1999-12-11	T6	T11	19	T11	L4	19	6	4	0.684211	0.789474
27	F	2000-09-06	T6	T12	41	T12	L4	22	29	13	0.292683	0.409091	18	23
28	F	1998-03-07	T5	T10	26	T11	L3	34	8	9	0.692308	0.735294
29	F	1999-02-02	T4	T10	42	T10	L4	53	27	22	0.357143	0.584906
30	F	2000-06-15	T6	T11	42	T11	L3	37	34	20	0.190476	0.459459	0	18
31	F	2000-06-15	T7	T12	30	T12	L3	33	12	10	0.6	0.69697	15	30
32	F	2001-11-03	T3	T10	28	T10	L3	22	4	3	0.857143	0.863636
33	F	2000-04-17	T4	T11	25	T11	L4	18	4	6	0.84	0.666667
34	M	1997-07-19				T5	L2	21		4		0.809524
35	F	1999-07-12	T7	T12	29				2		0.931034		20	25
36	M	1999-11-28				T11	L3	20		2		0.9
37	F	1999-12-07				T11	L3	23		1		0.956522
38	F	2003-12-08	T5	T11	20	T11	L4	18	3	2	0.85	0.888889
39	F	1999-09-15	T5	T9	28				14		0.5
40	M	1998-10-06				T8	L3	19		3		0.842105	29	28
41	F	1998-04-04	T5	T12	50				21		0.58		20	34
42	F	1998-12-06	T7	T11	27	T12	L4	30	9	7	0.666667	0.766667
43	F	2001-02-16	T7	L1	22				11		0.5
44	F	2001-02-20				T4	L3	25		-7		1.28	26	30
45	F	2000-06-15	T6	T12	37	T1	L4	30	21	14	0.432432	0.533333	18	21
46	F	1999-03-18	T4	T11	26	T11	L4	25	3	3	0.884615	0.88	10	30
47	F	2002-02-15				T6	L2	25		-9		1.36	17	28
48	F	1997-11-19	T4	T11	25	T11	L4	27	3	1	0.88	0.962963	23	27
49	F	2000-01-01	T5	T10	26	T10	L3	17	11	0	0.576923	1	13	30
50	F	1999-06-19	T7	T12	24	T12	L4	32	9	3	0.625	0.90625
51	F	2004-05-05	T4	T12	37	T11	L4	21	13	14	0.648649	0.333333
52	F	1999-07-07	T6	T11	24	T11	L3	29	11	15	0.541667	0.482759
53	F	2000-06-15	T6	T11	20	T11	L3	30	7	11	0.65	0.633333	22	25
54	F	2001-11-05				T6	L2	39		3		0.923077
55	F	1991-02-10	T6	T11	21				6		0.714286
56	F	2001-09-25	T6	T11	32	T11	L3	35	18	5	0.4375	0.857143	10	33
57	F	2000-04-02				T10	L2	30		0		1	18	28
58	M	1997-02-11	T6	T12	43°	T12	L4	30°
59	F	2001-07-09	T6	T11	25	T11	L4	27	8	2	0.68	0.925926	27	28
60	F	2000-04-04	T5	T12	38	T12	L3	45	14	25	0.631579	0.444444	18	25
61	F	2005-11-26	T5	L1	22				0		1		18	24
62	F	1998-03-29	T6	T11	38	T11	L4	38	19	23	0.5	0.394737
63	F	2000-02-29	T7	L1	35				0		1
64	F	1999-03-27	T5	T10	36	T10	L3	16	13	3	0.638889	0.8125	14	20
65	F	2000-12-19	T7	T12	20				6		0.7		28	30
66	F	2000-01-30				T11	L4	32		2		0.9375
67	F	1999-11-22	T7	T12	28	T12	L4	27	8	6	0.714286	0.777778	28	39
68	F	2002-12-10	T5	T9	23				4		0.826087
69	F	1999-11-03				T11	L2	27		4		0.851852
70	F	2001-10-14	T8	T12	30	T12	L4	28	12	9	0.6	0.678571	9	28
71	F	2003-02-14	T5	T10	32				14		0.5625		0	27
72	F	1999-02-20				T10	L3	31		5		0.83871
73	M	1996-09-07	T3	T11	22	T11	L4	21	5	3	0.772727	0.857143
74	F	1997-06-13	T6	T11	32	T11	L4	18	16	8	0.5	0.555556	29	33
75	F	1998-10-23	T6	T12	26	T12	L4	18	6	0	0.769231	1	18	28
76	F	2000-08-06	T5	T11	22	T11	L4	16	0	1	1	0.9375
77	M	2001-03-23	T7	L1	23				-2		1.08696
78	F	1999-12-05	T5	T10	37				18		0.513514		23	34
79	F	1999-07-06	T5	T10	42				22		0.47619
80	F	2001-01-13	T5	T11	29	T11	L3	36	19	30	0.344828	0.166667	15	25
81	F	2000-04-16	T6	T11	27	T11	L4	35	14	20	0.481481	0.428571
82	F	2000-07-12	T6	T10	24	T10	L4	22	12	7	0.5	0.681818	15	21
83	F	2002-12-07				T12	L4	23		9		0.608696
84	F	2000-03-30	T6	T11	41	T12	L4	28	20	13	0.512195	0.535714
85	F	2001-09-03				T9	L3	25		-5		1.2
86	F	2002-03-21				T9	L2	22		-5		1.22727	15	33
87	M	1999-10-28				T9	L2	26		0		1
88	F	2002-05-13	T6	T12	37				9		0.756757		13	35
89	F	1999-06-05	T5	T10	30	T11	L4	37	9	11	0.7	0.702703
90	F	2000-01-12	T5	T12	39				0		1		25	35
91	F	2002-04-22	T6	T11	35	T11	L3	30	19	16	0.457143	0.466667	19	23
92	F	2002-03-27	T5	T11	39	T11	L4	27	18	6	0.538462	0.777778	26	35
93	F	1998-12-05				T10	L3	24		3		0.875
94	M	1999-02-22	T4	T10	22	T10	L2	30	8	8	0.636364	0.733333
95	F	1999-01-02				T10	L2	30		2		0.933333	16	32
96	F	2000-01-19	T8	T12	25	L1	L5	25	4	0	0.84	1
97	F	2003-10-05	T5	T11	32	T11	L4	27	18	11	0.4375	0.592593	21	40
98	F	1997-01-19				T10	L2	27		1		0.962963
99	M	1998-04-19	T7	L1	30				8		0.733333		13	32
100	F	2000-05-26				T10	L3	22		-17		1.77273	22	26
101	F	1999-10-12				T11	L2	22		1		0.954545
102	M	1996-07-11	T6	T10	48	T11	L4	24	20	3	0.583333	0.875
103	F	2000-02-29				T11	L4	28		9		0.678571	18	25
104	F	2004-04-17	T6	T12	24	T12	L4	30	6	0	0.75	1	20	38
105	F	1998-02-01	T7	T12	22	T12	L3	29	7	0	0.681818	1
106	F	1999-11-06				T11	L3	40		17		0.575
107	F	2002-06-12	T7	T12	28				10		0.642857		20	20
108	F	1999-06-15	T6	T10	34	T10	L3	32	18	15	0.470588	0.53125
109	F	2002-07-22				T10	L3	33		21		0.363636
110	F	2001-01-27	T6	T12	40	T12	L4	28	21	12	0.475	0.571429
111	M	2000-06-25	T5	T12	27				3		0.888889
112	M	1996-03-25				T11	L4	28		4		0.857143
113	M	1999-03-15	T6	T11	33	T12	L4	25	17	13	0.484848	0.48
114	M	1997-08-15	T5	T12	39				19		0.512821		14	31
115	F	2000-02-16				T12	L4	35		8		0.771429
116	F	2002-09-01	T6	L1	25				2		0.92		11	29
117	M	1999-12-08	T5	L2	20				2		0.9
118	F	2002-05-16	T7	L1	31				2		0.935484
119	M	1998-04-28	T6	T12	47	T11	L3	35	19	18	0.595745	0.485714
120	F	1998-04-15	T6	T10	27				9		0.666667
121	F	2000-10-02	T7	T12	28	T12	L4	28	14	15	0.5	0.464286	28	30
122	M	2004-05-27	T6	T11	27				11		0.592593
123	F	1999-05-14	T6	T11	22	T11	L4	20	8	5	0.636364	0.75	18	23
124	F	2006-06-20	T6	T11	42	T11	L4	31	17	11	0.595238	0.645161	21	35
125	M	1998-08-27				T11	L2	27		14		0.481481
126	F	2003-09-01	T6	L1	24				0		1		22	32
127	F	2007-09-13	T7	L2	30				3		0.9
128	F	2000-11-22	T7	T11	20	T11	L4	21	10	8	0.5	0.619048
129	F	1999-06-25	T7	T1	22	T11	L3	31	9	3	0.590909	0.903226
130	F	2001-06-17				T10	L3	25		0		1
131	F	2005-03-19				T11	L3	33		2		0.939394	27	37
132	F	1998-12-11	T7	L2	28				0		1
133	F	2001-06-11				T11	L3	20		0		1
134	F	2001-06-11				T10	L3	21		0		1
135	F	1996-09-08	T8	T12	26	T12	L3	33	16	15	0.384615	0.545455	23	31
136	M	1999-02-04	T5	T12	22				0		1
137	F	2002-06-21	T6	T12	36	T12	L4	27	8	1	0.777778	0.962963	25	36
138	F	2006-03-01	T7	L1	44	L1	L4	25	13	9	0.704545	0.64
139	F	2000-07-28	T6	T12	30	T12	L4	20	8	0	0.733333	1
140	F	2000-06-16				T8	L3	25		0		1	27	40
141	F	1998-11-09	T8	L1	28				3		0.892857		25	22
142	F	2000-02-29	T9	L1	21				0		1		29	27
143	F	2000-12-22	T6	T12	47	T12	L4	22	24	7	0.489362	0.681818	18	29
144	F	1999-10-06	T6	T12	25	T12	L4	27	10	1	0.6	0.962963	3	18
145	F	1997-09-20	T7	L1	33				0		1		27	23
146	F	1998-07-30	T6	T10	21	T11	L4	20	0	0	1	1
147	F	2001-10-21	T6	T12	44	T12	L4	34	24	17	0.454545	0.5	18	29
148	F	1996-09-16	T4	T11	35	T11	L4	21	8	5	0.771429	0.761905	15	29
149	F	1999-05-05				T9	L2	21		-18		1.85714	25	31
150	F	1999-09-22	T6	T11	45				28		0.377778		27	33
151	F	2002-01-11	T7	T12	22				8		0.636364		29	31
152	F	2001-01-05	T7	T11	22	T11	L3	25	0	2	1	0.92	15	32
153	F	1997-09-12	T7	T12	38	T12	L4	46	23	19	0.394737	0.586957	17	28
154	F	1997-04-26				T11	L3	22		0		1
155	F	2002-12-24	T5	T10	36	T10	L2	42	9	1	0.75	0.97619
156	F	1999-09-07				T12	L4	22		6		0.727273
157	F	2001-04-18	T5	T11	35	T11	L4	25	22	9	0.371429	0.64	13	30
158	F	2000-01-05	T7	L1	31				15		0.516129		9	25
159	F	1999-09-16	T5	T11	34	T11	L4	30	22	11	0.352941	0.633333	18	19
160	F	2002-11-22	T8	T12	30				19		0.366667
161	F	2000-02-11	T6	T11	20	T11	L4	22	0	0	1	1	8	20
162	F	2003-02-16	T4	T10	35	T10	L3	45	19	23	0.457143	0.488889
163	F	2002-04-25	T5	T10	32	T10	L4	26	14	6	0.5625	0.769231
164	F	2002-05-14	T8	L1	27				8		0.703704		23	30
165	M	2001-10-07	T6	T12	30	T12	L4	28	18	22	0.4	0.214286	28	35
166	F	1998-07-22	T8	L1	48				21		0.5625
167	M	1998-04-16	T4	T11	46	T11	L4	50	27	26	0.413043	0.48	24	37
168	F	1999-09-14	T6	T12	28	T12	L4	32	12	15	0.571429	0.53125
169	F	1999-12-10				T11	L3	36		8		0.777778
170	F	1999-12-16	T6	L1	25				0		1		9	19
171	F	2002-07-29	T5	T10	20				6		0.7
172	F	2003-05-05	T5	T9	20	T9	L3	31	12	0	0.4	1
173	F	2000-07-04	T7	L1	33				0		1		18	25
174	F	2000-09-12	T6	T11	41	T11	L4	31	19	7	0.536585	0.774194	8	26
175	F	1998-04-30	T8	L1	23				5		0.782609
176	F	2000-02-08	T7	T12	40	T12	L4	35	18	17	0.55	0.514286
177	F	1999-07-16	T10	L1	21	L1	L5	30	4	6	0.809524	0.8
178	F	2001-12-06	T6	L1	23				1		0.956522		22	31
179	M	2001-05-27	T5	T11	33				25		0.242424
180	F	2000-07-05				T11	L3	23		2		0.913043	27	31
181	F	2000-03-30				T11	L3	28		0		1
182	F	1997-09-22	T5	T11	40	T11	L4	40	29	28	0.275	0.3
183	F	2002-08-02				T11	L3	26		0		1	27	39
184	F	1999-09-17	T6	T10	22	T10	L2	20	9	2	0.590909	0.9	26	32
185	M	1998-04-21				T9	L3	26		0		1
186	F	2001-01-09	T6	T11	21				10		0.52381		18	26
187	F	2000-12-08				T8	L2	22		0		1
188	M	1997-08-14				T7	L2	26		-7		1.26923
189	F	1999-10-07				T8	L2	42		10		0.761905	7	20
190	F	1999-05-15	T10	L1	27	L1	L4	25	3	8	0.888889	0.68
191	F	1999-05-12				T9	L2	29		13		0.551724
192	F	1999-06-17	T6	T11	26	T11	L4	26	9	1	0.653846	0.961538	22	28
193	F	2000-05-19	T5	T11	58	T12	L4	50
194	F	2002-03-30	T6	T12	27	T12	L4	20	18	8	0.333333	0.6	11	18
195	F	1999-01-18				T9	L3	27		0		1
196	F	2002-01-24	T7	T11	36	T11	L4	20	13	0	0.638889	1
197	M	2000-03-11				T9	L2	27		0		1
198	F	2001-06-17				T10	L2	29		0		1	29	32
199	M	2000-11-14	T6	T12	16				10				23	33
200	F	2001-01-22	T6	L1	41				5		0.878049
201	F	2002-05-15	T3	L3	25				3		0.88		25	37
	F
	F
202	F	1998-08-11	T4	T10	36	T10	L3	28	20	7	0.444444	0.75
203	F	2000-07-18	T5	T10	25	T10	L4	22	7	5	0.72	0.772727
204	M	1999-12-17	T5	T11	28				7		0.75
205	F	1999-03-20	T7	T12	32	T12	L4	25	24	19	0.25	0.24
206	F	1999-03-10				T11	L4	28		15		0.464286
207	F	2000-10-17				T11	L3	25		1		0.96
208	F	1999-08-24	T5	T11	58	T11	L4	31	43	22
209	F	2006-09-21	T7	T12	30	T12	L3	23	5	7	0.833333	0.695652
210	F	1999-10-02	T5	T10	30	T10	L3	36	19	19	0.366667	0.472222
211	F	1999-11-13				T8	L2	32		0		1
212	F	1999-07-18	T4	T11	20				6		0.7
213	F	1999-06-06	T5	T11	40	T11	L4	29	22	9	0.45	0.689655
214	F	2001-03-01	T6	T12	43	T12	L4	28	22	8	0.488372	0.714286
215	F	1999-12-04	T7	T11	49	T11	L3	58	39	36
216	M	2000-10-30	T6	T12	35				12		0.657143
217	M	1997-07-08				T9	L3	36		8		0.777778
218	M	1998-03-30				T10	L3	27		4		0.851852
219	F	1999-12-29	T7	T12	32	T12	L4	34	19	12	0.40625	0.647059
220	F	2001-04-18	T4	T11	23				0		1
221	F	2001-06-15	T6	T11	36	T12	L4	28	28	10	0.222222	0.642857
222	F	2000-03-21	T6	T11	23	T11	L3	22	7	10	0.695652	0.545455
223	F	2002-01-31				L1	L5	25		16		0.36
